# Supplementary material
Source: PubMed Central journal article supplement (PMC3279573)
Supplement: NIHMS346719-supplement-01.pdf [file NIHMS346719-supplement-01.pdf]

**Electronic protocols for ART patient triaging**  
**Supplemental Table I - Patients missed for referral**

| Physician Reasons for Recommended Referral                                      | Physician Action                         | Related screening question included in protocol | Referred if PDA question included | Comments                                                                                                                                               |
|---------------------------------------------------------------------------------|------------------------------------------|-------------------------------------------------|-----------------------------------|--------------------------------------------------------------------------------------------------------------------------------------------------------|
| Adherence                                                                       | None listed                              | Y                                               |                                   | Answered "no" to adherence problems                                                                                                                    |
| Adherence                                                                       | None listed                              | Y                                               |                                   | Answered "no" to adherence problems                                                                                                                    |
| Adherence; Review lab results                                                   | None listed                              | Y                                               |                                   | Answered "no" to adherence problems; Need to review labs not recorded in charts                                                                        |
| Adherence; Review lab results                                                   | Routine blood monitoring                 | Y                                               |                                   | Answered "no" to adherence problems; Need to review labs not recorded in charts                                                                        |
| Adherence; Review lab results                                                   | Ordered viral load test                  | Y                                               |                                   | Answered "no" to adherence problems; Need to review labs not recorded in charts                                                                        |
| Breast mass; Anemia                                                             | Referred for mamogram                    | Y                                               |                                   | Answered "no" to changes in abdomen/breast; No specific question about anemia; Answered "no" to other problems, other medical problems and feeling ill |
| Confusion; Adherence problems                                                   | Social referral                          | Y                                               |                                   | Answered "no" to adherence problems; No specific question for confusion                                                                                |
| Diabetes; Hyperlactaemia follow-up                                              | Hyperlactaemia follow-up                 | Y                                               |                                   | Need to review labs not recorded in charts; Answered "no" to other problems, other medical problems and feeling ill                                    |
| Fungal infection in finger                                                      | None listed                              | Y                                               |                                   | Answered "no" to rash                                                                                                                                  |
| Genital discharge                                                               | Given treatment for STI                  | Y                                               |                                   | Answered "no" to genital problems                                                                                                                      |
| Genital discharge                                                               | None listed                              | Y                                               |                                   | Answered "no" to genital problems                                                                                                                      |
| Kaposi sarcoma                                                                  | Referred to oncology                     | Y                                               |                                   | Answered "no" to rash                                                                                                                                  |
| Patient had problems to discuss with doctor                                     | None listed                              | Y                                               |                                   | Answered "no" to other problems                                                                                                                        |
| Patient had problems to discuss with doctor                                     | None listed                              | Y                                               |                                   | Answered "no" to other problems                                                                                                                        |
| Patient had problems to discuss with doctor;                                    | None listed                              | Y                                               |                                   | Answered "no" to other problems                                                                                                                        |
| Patient had problems to discuss with doctor; Problems at home                   | Referral to social worker & home affairs | Y                                               |                                   | Answered "no" to other problems; Answered "yes" to problems at home                                                                                    |
| Patient had problems to discuss with doctor; Lipoatrophy; Headaches; Chest pain | Ordered ECG                              | Y                                               |                                   | Answered "no" to other problems; Answered "yes" to sexually active;                                                                                    |
| PPE                                                                             | None listed                              | Y                                               |                                   | Answered "no" to rash                                                                                                                                  |
| Rash                                                                            | Given topical OTC ointment               | Y                                               |                                   | Answered "no" to rash                                                                                                                                  |
| Rash                                                                            | Changed non-ART treatment                | Y                                               |                                   | Answered "no" to rash                                                                                                                                  |
| Rash                                                                            | Ordered test of liver enzymes            | Y                                               |                                   | Answered "no" to rash                                                                                                                                  |
| Rash                                                                            | Prescribed topical antibiotic            | Y                                               |                                   | Answered "no" to rash                                                                                                                                  |
| Rash; Skin lesions on finger leg                                                | None listed                              | Y                                               |                                   | Answered "no" to rash                                                                                                                                  |
| Review viral load results                                                       | None listed                              | Y                                               |                                   | Need to review labs not recorded in charts                                                                                                             |

**Electronic protocols for ART patient triaging**

| Physician Reasons for Recommended Referral     | Physician Action                  | Related screening question included in protocol | Referred if PDA question included | Comments                                                                                                                  |
|------------------------------------------------|-----------------------------------|-------------------------------------------------|-----------------------------------|---------------------------------------------------------------------------------------------------------------------------|
| Menorrhoea                                     | None listed                       | N                                               | N                                 | Answered "no" to missed periods                                                                                           |
| Coughing                                       | Chest Xray, Sputum for culture    | N                                               | N                                 | Answered "no" to coughing                                                                                                 |
| Diarrhea;Stomach pain/discomfort;Poor appetite | Ordered lactic acid test          | N                                               | N                                 | Answered "no" to stomach pain and diarrhea                                                                                |
| Monitoring liver function test                 | None listed                       | N                                               | N                                 | Answered "no" to all questions                                                                                            |
| Monitoring liver function test                 | None listed                       | N                                               | N                                 | Answered "no" to other problems, other medical problems and feeling ill                                                   |
| Peripheral Neuropathy                          | Special tests                     | N                                               | N                                 | Answered "no" to burning feet                                                                                             |
| Peripheral Neuropathy                          | None listed                       | N                                               | N                                 | Answered "no" to burning feet                                                                                             |
| Stomach pain/discomfort;                       | Given antibiotic                  | N                                               | N                                 | Answered "no" to stomach pain                                                                                             |
| Unspecified                                    | Special investigations TB         | N                                               | N                                 | Answered "no" to all TB related questions, including coughing, night chills, and breathing difficulties                   |
| Allergic conjunctivitis                        | None listed                       | N                                               | Y                                 | No specific questions about eyes; Answered "yes" to other medical problems                                                |
| Coughing                                       | None listed                       | N                                               | Y                                 | Answered "yes" to coughing                                                                                                |
| Coughing;General body pain                     | Special investigations for non-TB | N                                               | Y                                 | Answered "yes" to coughing                                                                                                |
| Peripheral Neuropathy                          | None listed                       | N                                               | Y                                 | Answered "yes" to burning feet                                                                                            |
| Back ache                                      | None listed                       | N                                               | U                                 | No specific question about back ache; Answered "no" to all questions                                                      |
| Breast pain                                    | None listed                       | N                                               | U                                 | No specific question about pain; Answered "no" to other problems, other medical problems and feeling ill                  |
| Constipation                                   | None listed                       | N                                               | U                                 | No specific questions about constipation; Answered "no" to other problems, other medical problems and feeling ill         |
| Eye problems                                   | Referred to eye specialist        | N                                               | U                                 | No specific question about eyes; Answered "no" to other problems, other medical problems and feeling ill                  |
| Insomnia                                       | None listed                       | N                                               | U                                 | No specific question about insomnia; Answered "no" to all questions                                                       |
| Joint pains                                    | None listed                       | N                                               | U                                 | No specific question related to joint pain; Answered "no" to other problems, other medical problems and feeling ill       |
| Leg pain                                       | None listed                       | N                                               | U                                 | No specific question for pain; Answered "no" to other problems, other medical problems and feeling ill                    |
| Menorrhagia                                    | Referral to gynecologist          | N                                               | U                                 | No specific questions about menorrhagia; Answered "no" to all questions                                                   |
| Mild high cholesterol                          | Referred to dietician             | N                                               | U                                 | No specific question related to high cholesterol; Answered "no" to other problems, other medical problems and feeling ill |
| Small Hemorrhoids                              | None listed                       | N                                               | U                                 | No specific question for hemorrhoids; Answered "no" to other problems, other medical problems and feeling ill             |
| Tiredness                                      | None listed                       | N                                               | U                                 | No specific question for tiredness; Answered "yes" to sexually active; Answered "no" to all other questions               |

46  
47  
48  
49

**Electronic protocols for ART patient triaging**

| Physician Reasons for Recommended Referral | Physician Action             | Related screening question included in protocol | Referred if PDA question included | Comments                                                                                                             |
|--------------------------------------------|------------------------------|-------------------------------------------------|-----------------------------------|----------------------------------------------------------------------------------------------------------------------|
| Unspecified                                | Referred to eye specialist   | N                                               | U                                 | No specific question about eyes; Answered "no" to other problems, other medical problems and feeling ill             |
| Weight loss                                | None listed                  | N                                               | U                                 | No specific question related to weight loss; Answered "no" to other problems, other medical problems and feeling ill |
| Admitted to hospital                       | Changed diabetes medications |                                                 |                                   | Answered "no" to all questions                                                                                       |
| Unspecified                                | Given antibiotic             |                                                 |                                   | Answered "no" to all physical complaints                                                                             |
| Unclear - "Patient came"                   | None listed                  |                                                 |                                   | Answered "yes" to new traditional medicines                                                                          |
| Unspecified                                | Referral (unspecified)       |                                                 |                                   | Answered "no" to all physical complaints; Answered "yes" to sexually active                                          |
| Unspecified                                | Referral (unspecified)       |                                                 |                                   | Answered "no" to all questions                                                                                       |
| Unspecified                                | Routine blood monitoring     |                                                 |                                   | Answered "yes" to sexually active; Answered "no" to all other questions                                              |
| Unspecified                                | Start non-ART medication     |                                                 |                                   | Answered "yes" to sexually active; Answered "no" to all other questions                                              |
| Unspecified                                | Referral (unspecified)       |                                                 |                                   | Answered "no" to all physical complaints; Answered "yes" to sexually active                                          |
| Unspecified                                | Referral (unspecified)       |                                                 |                                   | Answered "yes" to sexually active; Answered "no" to all other questions                                              |

25  
26  
27  
28  
29  
30  
31  
32  
33  
34  
35  
36  
37  
38  
39  
40  
41  
42  
43  
44  
45  
46  
47  
48  
49
